# Supplementary material for: Inputs of Total and Labile Dissolved Metals from Six Facilities Continuously Discharging Treated Wastewaters to the Marine Environment of Gran Canaria Island (Canary Islands, Spain)
Source: MDPI journal article supplement (doi:10.3390/ijerph182111582), 2021-11-04
Supplement: s1 [file s1]

### Supplementary Information S3:

These calculations consisted in establishing the existence of significant differences among the total dissolved metal concentrations measured in the discrete samples (Day 0, 2 and 4)) and the labile metal concentration accumulated in DGTs after exposure of 4 complete days in TP-6 facility. For that purpose, the independent samples t-test (Student test) was applied for each metal. The significance level was set at  $\alpha=0.05$ , corresponding to a confidence level of 95%.

These analyses were carried out by the open source Jamovi software ([www.jamovi.org](http://www.jamovi.org)), version 1.6.9. The table below, Table S12, summarizes the results of the test for each pair by metal.

**Table S2.** Results of the Student test for labile and total dissolved metal concentration comparison in TP-6 facility for each metal

| Metal | P-value | Result                                      |
|-------|---------|---------------------------------------------|
| Cd    | 0.992   | [total dissolved metals ] > [labile metals] |
| Ni    | 0.007   | [labile metals] > [total dissolved metals ] |
| Pb    | < 0.001 | [labile metals] > [total dissolved metals ] |
| Cr    | 0.077   | [total dissolved metals ] > [labile metals] |
| Cu    | <0.001  | [labile metals] > [total dissolved metals ] |
| Zn    | 0.994   | [total dissolved metals ] > [labile metals] |
| Fe    | < 0.001 | [labile metals] > [total dissolved metals ] |
| Mn    | 0.01    | [labile metals] > [total dissolved metals ] |
| Co    | 0.011   | [labile metals] > [total dissolved metals ] |
