# Supplementary material for: Inputs of Total and Labile Dissolved Metals from Six Facilities Continuously Discharging Treated Wastewaters to the Marine Environment of Gran Canaria Island (Canary Islands, Spain)
Source: MDPI journal article supplement (doi:10.3390/ijerph182111582), 2021-11-04
Supplement: s1 [file s1]

## Supplementary Information S4:

**Table S3.** Physicochemical parameters of each effluent spot sampling time across all sampling days. T, DO, EC and pH were recorded on-site with a calibrated multiparameter probe while DOC, SPM and Turb were determined at the laboratory in the collected spot samples.

| Facility | Day of sampling | T (°C) | DO<br>(% / mg·L <sup>-1</sup> ) | EC<br>(mS·cm <sup>-1</sup> ) | pH<br>(pH units) | DOC<br>(mg·L <sup>-1</sup> ) | SPM<br>(mg·L <sup>-1</sup> ) | Turb<br>(FNU) |
|----------|-----------------|--------|---------------------------------|------------------------------|------------------|------------------------------|------------------------------|---------------|
| TP-1     | Day 0           | 24.7   | 89.8 / 7.02                     | 2.85                         | 7.29             | 8.2                          | 3                            | 2.37          |
|          | Day 2           | 27.0   | 88.3 / 6.96                     | 3.15                         | 7.45             | 11.2                         | 4                            | 2.20          |
|          | Day 4           | 26.7   | 91.9 / 7.24                     | 3.41                         | 7.62             | 11.2                         | 4                            | 1.12          |
| TP-2     | Day 0           | 28.3   | 84.9 / 6.54                     | 3.09                         | 7.35             | 13.5                         | 4                            | 2.72          |
|          | Day 2           | 28.7   | 83.9 / 6.40                     | 4.03                         | 7.39             | 15.2                         | 18                           | 9.06          |
|          | Day 4           | 27.9   | 85.7 / 6.66                     | 3.13                         | 7.42             | 13.2                         | 4                            | 2.64          |
| TP-3     | Day 0           | 28.6   | 94.7 / 7.31                     | 1.85                         | 7.35             | 7.8                          | 2                            | 1.26          |
|          | Day 2           | 28.7   | 91.7 / 7.08                     | 1.67                         | 7.51             | 7.6                          | 2                            | 1.02          |
|          | Day 4           | 29.0   | 93.9 / 7.20                     | 1.66                         | 7.73             | 6.8                          | 2                            | 0.44          |
| TP-4     | Day 0           | 26.0   | 22.3 / 1.80                     | 3.12                         | 4.88             | 817.8                        | 413                          | 481           |
|          | Day 2           | 26.2   | 10.7 / 0.85                     | 4.19                         | 4.73             | 1188.0                       | 740                          | 668           |
|          | Day 4           | 24.9   | 4.5 / 0.36                      | 2.91                         | 5.24             | 254.5                        | 223                          | 156           |
| TP-5     | Day 0           | 27.9   | 102.9 / 6.64                    | 52.05                        | 6.81             | 1.9                          | 18                           | 10.90         |
|          | Day 2           | 28.0   | 97.0 / 6.19                     | 55.50                        | 6.96             | 1.2                          | 6                            | 2.91          |
|          | Day 4           | 26.6   | 101.2 / 6.60                    | 55.60                        | 6.79             | < 0.5                        | 6                            | 3.11          |
| TP-6     | Day 0           | 22.2   | 101.8 / 7.12                    | 55.67                        | 7.38             | 2.0                          | 2                            | 0.27          |
|          | Day 2           | 22.7   | 103.1 / 7.16                    | 55.54                        | 7.24             | 1.1                          | 3                            | 0.89          |
|          | Day 4           | 21.9   | 102.0 / 7.19                    | 55.55                        | 7.19             | 1.5                          | 3                            | 0.61          |

T: temperature ; DO: dissolved oxygen; EC: electrical conductivity (25 °C); DOC: Dissolved Organic Carbon; SPM: suspended particulate matter; Turb: turbidity.
